# Supplementary material for: Palladium/palladium oxide coated electrospun fibers for wearable sweat pH-sensors
Source: PubMed Central journal article supplement (PMC6586619; doi:10.1038/s41598-019-45399-2), 2019-06-20
Supplement: 41598_2019_45399_MOESM1_ESM.pdf [file 41598_2019_45399_MOESM1_ESM.pdf]

## **Supplementary information**

**Palladium/palladium oxide coated electrospun fibers for wearable sweat pH-sensors**

*Victor C. Diculescu, Mihaela Beregoi, Alexandru Evangelidis, Raluca F. Negrea, Nicoleta G. Apostol, Ionut Enculescu*

Photograph obtained during the mechanical stress test through bending of the pH-sensor and OCP values recorded before and after some bending cycles.

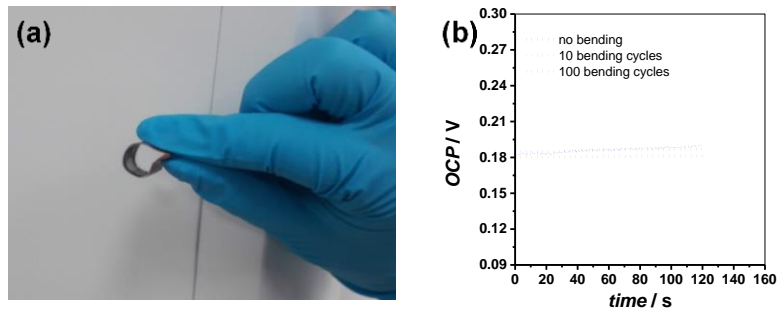

**Figure S1. (a)** Photograph of the sensor subjected to mechanical stress.

**(b)** OCP values of the pH-sensor recorded in artificial sweat at pH = 7.4 before and after 10 or 100 bending cycles.
